1                    **A Cut/cohesin axis alters the chromatin landscape to facilitate neuroblast death**

2  
3                    Richa Arya<sup>1,2</sup>, Seda Gyonjyan<sup>1</sup>, Katherine Harding<sup>1</sup>, Tatevik Sarkissian<sup>1,3</sup>, Ying Li<sup>4</sup>, Lei Zhou<sup>4</sup> and  
4                    Kristin White<sup>1</sup>

5  
6                    1. CBRC, Massachusetts General Hospital Research Institute/Harvard Medical School, Boston,  
7                    MA 02129, USA

8  
9                    2. Current address: Dr. B.R. Ambedkar Center for Biomedical Research (ACBR), University of  
10                    Delhi, University Enclave, New Delhi- 110007, India

11  
12                    3. Current address: Molecular & Cell Biology Program, Brandeis University, Waltham, MA

13  
14                    4. Department of Molecular Genetics and Microbiology, College of Medicine / UFHealth Cancer  
15                    Center / UF Genetics Institute, University of Florida, Gainesville, FL 32610

16  
17                    Corresponding author: [Kristin.white@MGH.Harvard.edu](mailto:Kristin.white@MGH.Harvard.edu)

18  
19                    key words: Developmental cell death, Drosophila, Neuroblast, Cut, Cohesin

20

21 **Summary statement**

22 Cut regulates the programmed death of neural stem cells by altering cohesin levels and  
23 promoting a more open chromatin conformation to allow cell death gene expression.

24 **Abstract**

25 Precise control of cell death in the nervous system is essential for development. Spatial and  
26 temporal factors activate the death of *Drosophila* neural stem cells (neuroblasts) by controlling  
27 the transcription of multiple cell death genes through a shared enhancer, *enh1*. The activity of  
28 *enh1* is controlled by *abdominalA* and *Notch*, but additional inputs are needed for proper  
29 specificity. Here we show that the Cut DNA binding protein is required for neuroblast death,  
30 acting downstream of *enh1*. In the nervous system, Cut promotes an open chromatin  
31 conformation in the cell death gene locus, allowing cell death gene expression in response to  
32 *abdominalA*. We demonstrate a temporal increase in global H3K27me3 levels in neuroblasts,  
33 which is enhanced by *cut* knockdown. Furthermore, *cut* regulates the expression of the cohesin  
34 subunit Stromalin in the nervous system. The cohesin components Stromalin and NippedB are  
35 required for neuroblast death, and knockdown of Stromalin increases repressive histone  
36 modifications in neuroblasts. Thus Cut and cohesin regulate apoptosis in the developing  
37 nervous system by altering the chromatin landscape.

38

## 39 Introduction

40 Programmed cell death is important for normal nervous system development in  
41 organisms ranging from *C. elegans* to humans (Arya and White, 2015). Precise control of cell  
42 death in the nervous system requires the integration of spatial, temporal and cell identity  
43 signals from both cell intrinsic and extrinsic sources. Conserved signaling pathways that are  
44 instrumental in many developmental cell fate decisions also control the commitment of cells to  
45 death. Examining how these pathways interact to specify the cell death fate in a specific  
46 context is critical not only for understanding normal development but also to gain insight into  
47 how developmental pathways and homeostasis are disrupted in diseases such as cancer and  
48 neurodegeneration.

49 The RHG genes, *reaper (rpr)*, *hid*, *grim* and *sickle (skl)* are required for virtually all cell  
50 death in the *Drosophila* embryo (White et al., 1994; Tan et al., 2011). These genes are  
51 transcriptionally activated in various combinations in cells fated to die. In the genome, the RHG  
52 genes are clustered in a 270kb death gene locus that is largely devoid of other genes. The large  
53 intergenic regions between the genes are highly conserved and contain cell type and  
54 temporally specific regulatory elements capable of activating different combinations of RHG  
55 genes to initiate cell death in specific developmental contexts (Bangs et al., 2000; Moon et al.,  
56 2008; Zhang et al., 2008; Tan et al., 2011; Arya and White, 2015).

57 To gain insight into the transcriptional regulation of cell death, we conducted a forward  
58 screen for genes required for the death of neural stem cells or neuroblasts (NBs) in the  
59 developing ventral nerve cord (VNC). A subset of NBs in the abdominal segments of the VNC is  
60 eliminated by apoptosis late in embryonic development (Truman and Bate, 1988; White et al.,

61 1994; Peterson et al., 2002). In the absence of this death, the VNC becomes massively  
62 hypertrophic, and adult longevity is compromised (Peterson et al., 2002). We previously  
63 described how the Hox gene *abdominalA* (*abdA*) and *Notch* (*N*) are necessary and sufficient for  
64 NB death in the abdominal segments of the embryonic VNC (Arya et al., 2015). *N* activation in  
65 NBs requires the expression of the Delta ligand on NB progeny, and is required for a late pulse  
66 of *abdA* in NBs. *abdA* is necessary for abdominal NB death, and the late pulse of *abdA* could  
67 convey both spatial and temporal information about the specific NBs fated to die. Mis-  
68 expression of *abdA* is sufficient to cause ectopic NB death.

69 *abdA* regulates *rpr*, *grim* and *skl* expression through a regulatory element between *rpr*  
70 and *grim* called the Neuroblast Regulatory Region enhancer1 (*enh1*) (Arya et al., 2015). This  
71 element is required for the expression of *rpr*, *grim* and *skl* in NBs (Tan et al., 2011). Recent data  
72 indicate that *abdA*, *grainyhead* (*grh*) and *Su(H)*, downstream of *N* pathway activation, may be  
73 direct regulators of this neuroblast cell death enhancer (Khandelwal et al., 2017). However, it is  
74 clear that not all cells that express *abdA* and/or *grainyhead* activate the cell death genes and  
75 undergo cell death (KH and KW, unpublished observations). Thus, input from other factors  
76 must be required for the activation of NB death.

77 Here we report that the DNA binding protein Cut is required for NB death, acting  
78 through a mechanism distinct from *AbdA* and *enh1*. Cut is a transcriptional regulator with 4  
79 DNA binding domains: 3 CUT domains and a Homeobox domain (Nepveu, 2001). *Drosophila*  
80 Cut is structurally and functionally homologous to Cux/CCAAT displacement protein (CDP) in  
81 human and Cux 1,2 in mouse, and can act as either an enhancer or repressor of transcription.  
82 In the *Drosophila* embryo, *cut* is expressed in the embryonic central and peripheral nervous

83 system, Malpighian tubules and anterior and posterior spiracles (Blochlinger et al., 1990; Zhai et  
84 al., 2012). Loss of *cut* in the fly can enhance tumor growth, and *cut* has also been implicated in  
85 promoting differentiation and cell survival in posterior spiracle and tracheal development (Zhai  
86 et al., 2012; Pitsouli and Perrimon, 2013; Wong et al., 2014). In mammals, the functions of the  
87 Cux1 and Cux2 homologues are equally complex. Loss of Cux1 in mouse results in reduced  
88 proliferation and organ hypoplasia (Sansregret and Nepveu, 2008), but Cux1 has also been  
89 implicated as a haploinsufficient tumor suppressor in myeloid malignancies, and is associated  
90 with poor prognosis (Wong et al., 2014). Paralleling our findings on the role of *Drosophila cut* in  
91 NB death, Cux2 is required to limit the expansion of neuronal precursors in mouse brain  
92 development (Cubelos et al., 2008), but conversely in the spinal cord it is required for the  
93 maintenance of neural progenitors (Iulianella et al., 2008).

94 To examine how *cut* regulates cell death, we placed it in the regulatory framework  
95 defined by our previous studies (Arya et al., 2015). Our data indicate that *cut* plays a permissive  
96 role in neural stem cell apoptosis, acting to modify the chromatin landscape of the *rpr* region,  
97 to facilitate the expression of *rpr* and *grim* independently of the previously identified NB  
98 enhancer. We show that there is normally a temporal progression of NBs from an H3K27me3  
99 low to an H3K27me3 high state, and H3K27me levels are enhanced throughout this progression  
100 in the absence of *cut*. In the cell death gene locus, this suppresses proapoptotic gene  
101 expression.

102 Importantly, we found that *cut* regulates expression of the cohesin subunit *stromalin*  
103 (*SA*). Cohesin is important for sister chromatid cohesion and long-range enhancer promoter  
104 interactions (Rollins et al., 1999; Kagey et al., 2010). We demonstrate that cohesin components

105 are required for normal NB death, and that loss of cohesin results in increased numbers of NBs  
106 with high levels of H3K27me3. We propose a model for the regulation of NB death through the  
107 combinatorial control of chromatin accessibility, chromatin architecture, and the temporal and  
108 spatial activity of sequence-specific transcription factors.

## 109 **Results**

### 110 ***cut* is necessary and sufficient for abdominal NB death**

111 The *cut* gene was identified in an RNAi screen for regulators of NB death (Arya et al.,  
112 2015). Knockdown of *cut* in the CNS with multiple RNAi lines results in a large increase of  
113 persistent NBs late in Drosophila embryogenesis (Fig. 1B), at a time when the majority of  
114 abdominal NBs have undergone apoptosis in the wild type (Fig. 1A). Ectopic abdominal NB  
115 survival is also detected in 3<sup>rd</sup> instar larvae (Fig. S1). Embryos homozygous for a *cut* null  
116 mutant, *cut*<sup>C145</sup> (Johnson and Judd, 1979; Micchelli et al., 1997) also show persistent abdominal  
117 neuroblasts in late embryogenesis (Fig. 1C). The rescue of NB death is not due to *cut* activity in  
118 neighboring glia, as *cut* knockdown in glia does not inhibit NB death (Fig. S1). Thus, *cut* is  
119 required for the programmed death of NBs in late embryogenesis.

120 *cut* is expressed in the CNS starting at early stage 12. Initial expression is very low, and  
121 is strongly expressed in many cells of the CNS, including NBs, by stage 15 (Fig. S2). Thus *cut* is  
122 expressed in NBs at a time when NB death begins (stage 14), and is expressed in most or all NBs  
123 at the time cell death peaks. Widespread *cut* expression in both NBs and neurons indicates that  
124 at normal levels, *cut* is not sufficient to activate apoptosis in all cells. Rather, *cut* may be  
125 permissive for the activation of the cell death genes by additional spatial and temporal factors,

126 including *N*, *abdA* and *grh* (Cenci and Gould, 2005; Maurange et al., 2008; Arya et al., 2015;  
127 Khandelwal et al., 2017).

128 Overexpression of *cut* in the CNS results in premature loss of NBs in abdominal  
129 segments (Fig. 1E, G). We see loss of many abdominal NBs at stage 14, before they normally  
130 die. This *cut*-induced NB loss can be inhibited by the baculovirus broad-spectrum caspase  
131 inhibitor p35, demonstrating that NB loss is due to caspase-dependent cell death, and not to  
132 alterations in NB fate (Fig. 1F, G). Overexpression of *cut* in the whole embryo with heatshock-  
133 gal4 also results in ectopic cell death (Fig. S3). Taken together, these findings demonstrate that  
134 *cut* is necessary for timely NB death, and is temporally limiting for the activation of cell death.

### 135 ***cut* acts upstream of *rpr* and *grim* and downstream of *enh1***

136 NB death requires the activity of the *rpr*, *grim* and *skl* genes (Tan et al., 2011). These  
137 genes are transcribed in doomed cells, and the Rpr, Grim and Skl proteins inhibit DIAP1 to  
138 activate caspases (Kornbluth and White, 2005). To determine whether *cut* regulates NB death  
139 through this pathway, we assessed *rpr* and *grim* transcript levels in the absence of *cut* and  
140 when *cut* is overexpressed. In stage 15 embryos both *rpr* and *grim* expression are clearly  
141 reduced when *cut* is knocked down in the CNS (Fig. 2A-D). Conversely, *cut* overexpression  
142 throughout the CNS with wor-gal4 results in a substantial increase in levels of *rpr* and *grim*  
143 transcripts when cell death is inhibited with p35 (Fig. 2E-H). Interestingly, even when *cut* is  
144 overexpressed in many or all cells of the CNS, *rpr* and *grim* are hyper-activated only in a subset.  
145 This suggests that *cut* is permissive for *rpr* and *grim* expression, but requires additional  
146 regulators to fully activate the NB death program.

147 Our previous studies identified a regulatory region between *rpr* and *grim*, the  
148 Neuroblast Regulatory Region, which controls *rpr*, *grim* and *skl* expression to promote  
149 abdominal NB death (Tan et al., 2011). A 5kb transgenic reporter generated from this region,  
150 enh1-GFP, is expressed in doomed abdominal NBs and is responsive to the levels of *N* and  
151 *abdA*, which regulate NB death (Arya et al., 2015). We found that *cut* does not regulate enh1-  
152 GFP activity: knockdown of *cut* does not decrease enh1-GFP expression. Instead, we see an  
153 increase in the number of enh1 expressing cells on *cut* knockdown (Fig. 2 I, J). This suggests  
154 that loss of *cut* blocks the death of enh1-GFP expressing cells. Furthermore, *cut*  
155 overexpression does not increase enh1-GFP levels, and is able to induce NB death in embryos  
156 that lack the NB enhancer1 due to the MM3 deletion (Tan et al., 2011) (data not shown).  
157 Therefore, *cut* acts independently of enh1 to facilitate the activation of *rpr* and *grim* for NB  
158 death (Fig. 2K).

### 159 ***cut* acts downstream of *abdominalA***

160 *abdA* is necessary and sufficient for abdominal NB apoptosis (Prokop et al., 1998; Arya  
161 et al., 2015; Khandelwal et al., 2017). Overexpression of *abdA* results in ectopic NB death and  
162 enhanced and ectopic enh1-GFP expression. If *cut* acts to regulate apoptosis downstream of  
163 *abdA*, *cut* knockdown should block killing by ectopic *abdA*. Indeed, we found that *cut*  
164 knockdown in the context of *abdA* overexpression blocks ectopic NB death in both thoracic and  
165 abdominal segments of the VNC (Fig 3A-C). Importantly, ectopic *abdA*-activated enh1-GFP  
166 expression is still apparent in *cut* knockdown (Fig. 3D-F), indicating that *cut* does not prevent  
167 *abdA* from activating the regulatory region, but blocks *rpr* and *grim* activation by the enhancer.  
168 We also found that *abdA* knockdown does not rescue NB death induced by *cut* overexpression



169 (Fig. 3G-J). These data support the conclusion that *cut* regulates NB death downstream of *abda*  
170 and *enh1*, and upstream of the RHG genes.

171 ***cut* does not inhibit NB death through a binding site in the IRER left barrier**

172 Enhancer/promoter interactions can be temporally controlled by changes in chromatin  
173 accessibility (Uyehara et al., 2017). Loss of *cut* inhibits NB death downstream of *enh1* activity,  
174 suggesting that *cut* could influence *rpr* and *grim* expression in NBs by influencing chromatin  
175 accessibility in the *rpr/grim* region. Another enhancer in the death gene locus, the irradiation  
176 responsive enhancer region (IRER), which is located 5' of the *rpr* promoter, shows temporal  
177 changes in chromatin conformation that are responsible for the reduced sensitivity to  
178 irradiation in later stages of embryogenesis (Zhang et al., 2008). Previous studies showed that  
179 in older embryos there is an abrupt change in chromatin conformation at the promoter  
180 proximal end of the IRER, with a sharp decrease in H3K27me3 and H3K9me3 and an enrichment  
181 of H3K4me3 at the *rpr* proximal promoter (Fig. S4) (Lin et al., 2011). This finding is consistent  
182 with our hypothesis that changes in chromatin conformation at the death gene locus regulate  
183 competence to respond to apoptosis-inducing signals, but does not address the biological role  
184 of the IRER in the regulation of NB death.

185 The previous study identified a chromatin barrier within the IRER (IRER left barrier  
186 element, or ILB) containing a putative Cut binding site that was necessary for barrier function.  
187 We therefore asked whether the Cut binding site in the ILB was critical to prevent  
188 heterochromatin spreading from the IRER into the *rpr* proximal promoter, therefore allowing  
189 *rpr* activation and NB death in response to activation of *enh1*. We generated several deletions  
190 of the putative Cut binding site using CRISPR/Cas9 (Fig. S4). We examined NB death in animals

191 homozygous for these deletions, and found that NB death was normal (Fig. S4). NB death is  
192 also normal in animals homozygous for the larger IRER deletion generated by the Zhou lab (data  
193 not shown). Thus the predicted Cut binding site in the ILB is not required for NB death  
194 downstream of enh1 activation. This result suggests that additional *cut*-dependent mechanisms  
195 could mediate communication between the NB enhancer and the *rpr* and *grim* promoters.

### 196 ***cut* inhibits NB death by altering repressive chromatin in NBs**

197 We hypothesized that an increase in repressive histone modifications at the death gene  
198 locus in NBs could limit NB death on *cut* knockdown. To test this, we assayed repressive and  
199 activating histone modifications by ChIP in control embryos and after CNS-specific *cut*  
200 knockdown. To enrich for NB chromatin and to limit stress-induced changes in cell death gene  
201 expression, ChIP was carried out on chromatin isolated from sorted fixed CNS nuclei from  
202 *wor>dsRed* (*wor>+*) and *wor>dsRed cutRNAi* (*wor>cutRNAi*) embryos (Bowman et al., 2013).

203 In contrast to data previously obtained from whole stage 16 embryos (14-16 h) (Negre  
204 et al., 2011), we noted that the overall enrichment for H3K27me3 was generally low in the *grim*  
205 to *rpr* region in CNS chromatin. In response to *cut* knockdown, we saw a slight enrichment for  
206 this repressive mark in this region (Fig. 4A), consistent with the decreased transcription of *grim*  
207 and *rpr* we detected in the absence of *cut* (Fig. 2). This suggests that *cut* may normally inhibit  
208 the formation of facultative heterochromatin in the *grim* to *rpr* region in the developing CNS.  
209 No major alterations in H3K27me3 were detected in the *bithorax* complex in any of our  
210 experiments (data not shown), indicating that *cut* does not regulate H3K27me3 levels at all  
211 genes in the CNS.

212 To confirm changes detected by CHIP-seq, we assayed H3K27me3 enrichment at several  
213 positions in the *rpr* region by CHIP-qPCR on independent chromatin preparations from fixed  
214 CNS nuclei. We repeatedly found that *cut* knockdown led to enrichment for H3K27me3 within  
215 the *rpr* and *grim* open reading frames, in the region 5kb upstream of *rpr* (Fig 4B), and at the *rpr*  
216 promoter (Fig. S5). We conclude that loss of *cut* increases repressed histone modifications in  
217 the RHG region in the developing CNS, and this could be responsible for decreased *rpr* and *grim*  
218 expression. However, the effect of *cut* knockdown is relatively limited, which could reflect  
219 redundant mechanisms underlying the activity of *cut*, or could be due to the low representation  
220 of the cells of interest (NBs) in our chromatin preparation.

221 To focus more precisely on *cut*-dependent changes in histone modifications in NBs, we  
222 stained control and *cut* knockdown embryos for H3K27me3. Strikingly, we found that in control  
223 embryos at stage 14, there was a clear difference in the overall levels of H3K27me3 in NBs, as  
224 compared to other tissues in the embryo, and to other cells in the CNS (Fig 4C). H3K27me3  
225 levels were low or undetectable in the ventral NB layer, and much higher in the more dorsal  
226 layers of the CNS containing the differentiated neurons and glia. This is not due to a defect in  
227 histone antibody accessibility in these cells, as other histone modifications were not strikingly  
228 different in NBs compared to other neural cells (Fig. S6). Quantification of NBs with high  
229 H3K27me3 showed that only 12% of NBs at stage 14 had high levels of H3K27me3 (Fig. 4D-E).  
230 The lower levels of the repressive H3K27me3 modification in early NBs may reflect the  
231 increased plasticity of chromatin in these stem cells (Marshall and Brand, 2017).

232 Furthermore, we found that levels of H3K27me3 increase in control NBs over time, so  
233 that by stage 16 about 30% of NBs were scored as H3K27me3 high. This increase in repressive

234 histone modifications could reflect a restriction of stem cell potential over developmental time.  
235 At all stages, the lower levels of H3K27me3 in NBs as detected by staining could explain the  
236 relatively low levels of H3K27me3 peaks detected in our ChIP experiments on CNS chromatin.

237 Surprisingly, we found that *cut* knockdown increased the number of NBs with high  
238 H3K27me3 at stages 14 through 16 (Fig. 4D-E). This indicates that *cut* in NBs is required to hold  
239 chromatin in a more open conformation by inhibiting the deposition of H3K27me3. This open  
240 conformation could be required for normal *rpr* and *grim* activation during the period of cell  
241 death. Loss of *cut* did not prevent the temporal increase in H3K27me3 levels, as NBs in older  
242 *cut* knockdown embryos had a higher number of H3K27me3-high NBs than earlier stages.

#### 243 **Cohesins operate downstream of *cut* to regulate NB death**

244 Because *cut* has not been characterized as a histone modifier or as part of a histone  
245 modifier complex, we hypothesized that the effect of *cut* knockdown on H3K27me3 levels in  
246 NBs was likely to be indirect. We scanned our H3K27ac ChIP-seq data to identify potential *cut*-  
247 regulated genes that could restrain H3K27me3 levels in NBs. Most genes did not exhibit  
248 changes in H3K27ac peaks, including Polycomb complex components. However, two structural  
249 components of the cohesin complex, *stromalin* (*SA*) and *SMC1* showed decreased H3K27ac  
250 levels following *cut* knockdown (Fig. 5A). The cohesin complex is implicated in three-  
251 dimensional chromatin architecture, including enhancer-promoter interactions (Kagey et al.,  
252 2010). Cohesin also interacts with the Polycomb Repressive Complex 1 (PRC1), and may  
253 sequester PRC1 from repressive chromatin, resulting in an overall mutually exclusive  
254 distribution of cohesin binding and repressive histone modifications (Misulovin et al., 2008;  
255 Schaaf et al., 2013).

256 We hypothesized that *cut* knockdown could decrease cohesin activity, leading to  
257 increased repressive chromatin and decreased cell death gene expression. A decrease in  
258 cohesin expression upon *cut* knockdown could interfere with communication between the NB  
259 enhancer and the *rpr* and *grim* promoters, altering their expression and inhibiting NB death. In  
260 addition, loss of cohesin could enhance the deposition of repressive chromatin to limit the  
261 expression of cell death genes.

262 To examine whether *SA* expression was controlled by *cut*, we assayed *SA* RNA levels by  
263 qPCR on RNA prepared from sorted CNS nuclei from control and *wor>cutRNAi* embryos (Fig.  
264 5B). *SA* RNA levels were decreased on *cut* knockdown (Fig. 5B). Furthermore, decreased *SA*  
265 protein levels were detected on *cut* knockdown in both NBs and neurons (Fig. 5C-E). In  
266 contrast, *Cut* protein levels in the CNS were not altered by *SA* knockdown (Fig. S7).

267 If *cut* regulates NB death by altering cohesin expression, then cohesin knockdown  
268 should phenocopy loss of *cut* and inhibit NB death. Indeed, we found that knockdown of *SA*  
269 results in ectopic NB survival in late embryos (Fig. 6A, B, D). In addition, knockdown of  
270 *NippedB*, part of the kollerin complex required for cohesin loading (Dorsett and Kassis, 2014),  
271 resulted in ectopic NB survival (Fig. 6C). These data demonstrate a previously unknown  
272 requirement for cohesin in the regulation of NB death.

273 Cohesin knockdown increases Pc binding at the majority of H3K27me3 marked genes  
274 (Schaaf et al., 2013). We examined overall H3K27me3 levels in NBs after cohesin knock down.  
275 We found that *SA* knockdown increased the number of NBs with high levels of H3K27me3 in  
276 embryos (Fig. 6E), suggesting that higher H3K27me3 levels in NBs on *cut* knockdown could be  
277 caused by decreased cohesin. Thus, cohesin is required for abdominal NB death, and may

278 regulate cell death gene expression by altering overall levels of repressive chromatin in NBs  
279 (Fig. 7).

280

## 281 **Discussion**

282 In this work we report that *cut* plays a previously unknown role in the regulation of NB  
283 death. *cut* is permissive for the expression of *rpr* and *grim*, acting downstream of the  
284 previously identified neuroblast regulatory region. We show that *cut* loss increases the number  
285 of NBs with high levels of H3K27me3, indicating a role for *cut* in maintaining open chromatin in  
286 NBs. At the RHG locus, this is reflected in higher levels of H3K27me3, associated with lower *rpr*  
287 and *grim* expression. Importantly, we find that *cut* regulates the levels of the cohesin subunit  
288 SA in the CNS, and we show that cohesin is required for NB death. This work demonstrates a  
289 novel connection between *cut* and cohesin in controlling the chromatin landscape and cell  
290 death in the developing CNS.

### 291 **Is *cut* the “cell identity” signal that is permissive for NB death?**

292 Our previous work identified the Hox gene *abdA* as an important spatial signal for NB  
293 death in the embryo (Arya et al., 2015). A late pulse of AbdA in NBs is regulated by *Notch*  
294 activation that is dependent on Delta ligand expression in NB progeny. *abdA* is necessary and  
295 sufficient for NB death, and has been shown to bind to enh1 in the Neuroblast regulatory  
296 region (Khandelwal et al., 2017). However, *abdA* is clearly expressed in many cells that do not  
297 die (Karch et al., 1990; Arya et al., 2015). Furthermore, mis-expression of *abdA* does not  
298 activate ectopic NB death prior to stage 13 of embryogenesis (Prokop et al., 1998; Arya et al.,

299 2015), suggesting that there are temporal and cell identity signals that regulate the competence  
300 of cells to respond to *abdA*.

301 Here we identify *cut* as a novel regulator of NB death. Expression of *cut* in the  
302 embryonic CNS increases as NB death begins. However, most cells that normally express *cut* do  
303 not die, indicating that other factors coordinate with *cut* to regulate NB death. We find that  
304 loss of *cut* inhibits *rpr* and *grim* transcription, but in contrast to *abdA* and N, *cut* does not act on  
305 *enh1*, as detected by *enh1*-GFP. In addition, *cut* knockdown blocks NB killing in response to  
306 *abdA* mis-expression, despite an expansion of *enh1* expression. These data indicate that *cut*  
307 acts downstream of *enh1*, and suggests that *cut* acts in the nervous system as a permissive  
308 factor that regulates the competence of NBs to respond to other cell death signals.

### 309 ***cut* alters the chromatin landscape in the nervous system**

310 We found that *cut* functions in the CNS to restrict overall levels of repressive  
311 H3K27me3-marked chromatin. We demonstrate that NBs have a significantly lower level of  
312 overall H3K27me3 than other tissues in the embryo, possibly associated with stem cell plasticity  
313 (Zhu et al., 2013). As embryos age, the number of NBs with high overall levels of H3K27me3  
314 increases. The cause and consequences of this transition are unknown, but could be related to  
315 a gradual restriction of NB fate (Yuzyuk et al., 2009; Zhu et al., 2013; Marshall and Brand, 2017).

316 We found that loss of *cut* promotes more NBs to acquire an H3K27me3 high state  
317 throughout later stages of embryogenesis. Interestingly, in both control and *cut* knockdown  
318 there is a temporal increase in the proportion of NBs with high H3K27me3. This suggests that

319 additional temporal factors control this maturation of NBs to a more repressed state, but *cut*  
320 restrains the number of H3K27me3 high cells throughout this transition.

321 Our data indicate that *cut* overexpression is sufficient to cause increased *rpr* and *grim*  
322 expression and apoptosis in NBs. This is not due to hyper-activation of *enh1*, as ectopic *cut*  
323 does not increase *enh1*-GFP expression and can cause NB death even in the absence of the  
324 neuroblast regulatory region. In addition, *cut* overexpression causes increased cell death in  
325 other cells that normally survive, as seen with heat shock-gal4. This suggests that ectopic *cut*  
326 could activate additional upstream apoptosis-inducing signals, directly activate *rpr* and *grim*  
327 expression, or could open the *rpr* region for activation by regulators that do not normally  
328 activate *rpr* and *grim*.

329 The role of *cut* in activating NB death is in contrast to previous work suggesting that *cut*  
330 inhibits cell death in the developing posterior spiracle by directly inhibiting *rpr* expression (Zhai  
331 et al., 2012). In the developing spiracle, *cut* is also required for normal differentiation. Several  
332 other tissues also require *cut* for normal differentiation, such as the bristle cells in the eye, and  
333 the developing trachea. In these tissues, cell death is also increased in the absence of *cut*  
334 (Pitsouli and Perrimon, 2010; Zhai et al., 2012). The role of *cut* in promoting cell survival in  
335 these tissues differs from its role in facilitating cell death in the CNS. This may reflect the  
336 diverse activities of *cut* as a transcriptional regulator, or could be due to *cut*'s activity as a  
337 chromatin organizer, altering the landscape for binding by both activators and repressors of  
338 RHG gene transcription. Both pro-differentiation and pro-apoptotic roles of *cut* are consistent  
339 with its role as a potential tumor suppressor (Zhai et al., 2012; Wong et al., 2014).



## 340 **Cell death genes are highly sensitive to altered chromatin accessibility**

341           This study, and previous work from the Zhou lab, indicates that the *rpr* region is  
342 particularly sensitive to alterations in chromatin conformation, reflecting the need for rapid and  
343 robust transcription of the cell death genes in cells fated to die. Other factors that control  
344 histone modifications are involved in cell death. For example the dUTX H3K27me3  
345 demethylase is required for Ecdysone Receptor-mediated activation of *rpr* expression in salivary  
346 gland death (Denton et al., 2013). This supports our finding that a more open chromatin  
347 conformation is particularly important for cell death gene activation. Expression of other  
348 components of the cell death pathway may also be controlled by changes in chromatin  
349 conformation. For example, treatment of *Drosophila* larvae with HDAC inhibitors, or HDAC1  
350 knockdown, increases sensitivity to cell death activation through altered expression of caspases  
351 (Kang et al., 2017). Conversely, loss of Polycomb-mediated suppression is associated with loss  
352 of postembryonic NBs, although this may be due to ectopic *abdA* expression (Bello et al., 2007).  
353 There is also evidence for epigenetic regulation of genes important for cell death in the  
354 mammalian nervous system and in cancer (Wright et al., 2007; Song et al., 2011). Here we  
355 provide evidence that control of histone modifications in the *rpr* region is an important aspect  
356 of developmental cell death regulation.

## 357 **Cohesin as a regulator of cell death**

358           Given the lack of evidence for a direct histone-modifying role of Cut in regulating cell  
359 death, we investigated alternative indirect mechanisms and determined that *cut* promotes  
360 expression of the cohesin subunit *SA*. We found that, similar to loss of *cut*, down-regulation of  
361 *SA* or Nipped-B results in ectopic NB survival. Cohesins are involved in sister chromatin

362 cohesion, formation of topologically associated domains and in long-range enhancer promoter  
363 interactions (Kagey et al., 2010; Newkirk et al., 2017). This latter function may be particularly  
364 important in *Drosophila* developmental cell death. Multiple cell death genes must be activated  
365 in different tissues in response to overlapping signals impinging on distinct regulatory  
366 enhancers (Jiang et al., 2000; Lohmann et al., 2002; Zhang et al., 2008; Arya et al., 2015;  
367 Khandelwal et al., 2017). This suggests that three dimensional chromatin interactions, including  
368 those mediated by cohesin, are critical for facilitating precise gene activation in the RHG region.

369         Loss of one copy of the human Nipped-B homolog NIBPL, and of other cohesin  
370 components, is associated with Cornelia de Lange syndrome, a developmental disorder  
371 affecting growth, cognitive function and facial and limb morphology (Wu et al., 2015; Newkirk  
372 et al., 2017). This is likely due to the downregulation of developmentally important genes, as  
373 detected in NIBPL +/- MEFs (Newkirk '17). Nipped-B heterozygous flies also exhibit reduced  
374 growth, learning and memory deficits, abnormal brain morphology and reduced expression of  
375 many genes (Wu et al., 2015). Interestingly, Nipped-B heterozygotes are resistant to dMyc  
376 induced apoptosis, a phenotype also seen in the IRER mutants (Wu et al., 2015; Zhang et al.,  
377 2015), suggesting that cohesin may also regulate cell death activated by the IRER enhancer.  
378 Our data suggest that control of cell death in the nervous system could also contribute to the  
379 Cornelia de Lange syndrome phenotype. Additional studies are needed to understand how  
380 cohesin activity is directed towards regulating the expression of specific genes.

381         Precise control of apoptotic gene expression is particularly important in the nervous  
382 system, the site of the majority of developmental cell death in flies, worms and mammals, and  
383 the tissue most affected by the absence of cell death (Arya and White, 2015). Our work has led

384 to a greater understanding of the temporal, spatial and tissue specific control of this death in  
385 flies through developmentally important transcription factors as well as regulation of chromatin  
386 accessibility and architecture. Given the conserved function of the pathways we have  
387 identified, it is likely that these studies will provide insight into the regulation of cell death in  
388 human nervous system development and disease.

389

## 390 **Materials and Methods**

### 391 **Embryo collection and nuclei preparation**

392 Embryos were collected for 16 hr. at 25°. Dechorionated embryos were fixed in 1:1 solution of  
393 1.8% formaldehyde and heptane for 15 min at room temperature. The fixative was quenched  
394 with a 2 min wash with 125 mM glycine in PBS with 0.1% Triton-X100 (PBS:130 mM NaCl, 7 mM  
395 Na<sub>2</sub>HPO<sub>4</sub>, 3 mM KH<sub>2</sub>PO<sub>4</sub>, , pH 8.0), and then briefly rinsed with PBS 0.1% Triton-X100. Embryos  
396 were snap frozen in liquid nitrogen, and stored at -80°C. About 1g of embryos of each genotype  
397 were used for nuclei isolation as described in Bowman et al. (Bowman et al., 2013; Bowman et  
398 al., 2014).

### 399 **Nuclear sorting and ChIP-seq**

400 Fixed nuclei from wor>dsRed embryos were enriched using a Bio-RAD S3e cell sorter with  
401 561nm excitation. Nuclei were sorted at 4<sup>0</sup>C in 100ul of PBS, with 1% BSA, 0.1% Triton-X and 1X  
402 protease inhibitor. wor-gal4 is expressed in the nervous system from stage 11 onwards (Arya et  
403 al., 2015). The sorted nuclei represent approximately 0.5-3% of total embryonic nuclei, and  
404 were at least 50% pure, based on post-isolation assessment of ds-red by confocal microscopy.

405 About a million nuclei were used for chromatin preparation. After isolation chromatin was  
406 fragmented with 15U of micrococcal nuclease (MNase, Worthington Biochemical) followed by 3  
407 min sonication in a Diagenode Bioruptor 377 (Bowman et al., 2013). Immunoprecipitation was  
408 carried out with 2ug of H3K27me3 antibody (Active Motif 39136) or 1ug of H3K27Ac antibody  
409 (Active Motif, 39136). Single end tag libraries were prepared and sequenced on an Illumina,  
410 HiSeq2500 in high output mode at the MGH Next Generation Sequencing Core).

#### 411 **ChIP-seq data analysis**

412 High throughput sequence data were processed and analyzed for quality. Samples with  
413 reasonable ChIP strength were further analyzed. Reads were mapped to the genome (dm6)  
414 with Bowtie2 (Langmead and Salzberg, 2012). The resulting SAM files were used to identify  
415 enrichment using MACS2 (Feng et al., 2012) and SICER (Xu et al., 2014). The resulting BED file  
416 of enriched genomic regions and the normalized BedGraph files were loaded to the UCSC  
417 Genome Browser for comparison and analysis.

#### 418 **ChIP- qRT-PCR analysis**

419 For the validation of ChIP-Seq data, ChIP-qPCR was performed. Immunoprecipitation conducted  
420 as described above using the H3K27me3 antibody. The immunoprecipitated DNA was  
421 processed for qPCR analysis using iTaq universal SYBER green supermix (Bio-Rad, CA) on an  
422 Applied Biosystems 7000 Real time system. Data was analyzed using the delta delta CT method.  
423 The following primers were used in the study:

424 Rpr2-F:TGGGTTGGCTCATGCTTATT

425 Rpr2-R:ATCCGAAGACCGGAAGAAAG  
426 5kb\_RA-F:CCGTCTACGGCCTTTGTTTA  
427 5kb\_RA-R:AGTGGAAGAACCAACCTGACA  
428 5kb\_lei-F:TTTTCGGAATGGGTTTTTCAG  
429 5kb\_lei-R:ACACACACGAACCGAATGAA  
430 GRIM2-F:TTATGCCAACAACCAACCAA  
431 GRIM2-R:CCCCCTTTCTAGTCCGAAG  
432 AbdbChip2-F:TCTACTCCACCGGTTTGCTC  
433 AbdbChip2-R:ACAGGCGGTCCTTATTGATG  
434 intergenicSKB-F:TCAAGCCGAACCCTCTAAAAT  
435 intergenicSKB-R:AACGCCAACAAACAGAAAATG  
436 rpr\_pro\_F:AGAAGGCCAAAATGAGCAGC  
437 rpr\_pro\_R:GCGCACACACTTTTCTTTTCG  
438 Act5C\_f ATGTGTGTGTGAGAGAGCGA  
439 Act5C\_b AAACCGACTGAAAGTGGCTG

#### 440 **Nuclear RNA preparation**

441 After isolation of nuclei, as described above, proteins were digested and crosslinking reversed  
442 in 20mM Tris/1mM CaCl<sub>2</sub>/0.5%SDS with 1U/ul RNase inhibitor and 500ug/ml proteinase K  
443 (Roche) at 55o for 3 hours. Approximately 600,000 nuclei were used for RNA purification with

444 RNAzol. A mix of oligodT and random hexamer primers were used for reverse transcription,  
445 and quantitative PCR was done on an Applied Biosystems 7000 Real time system. DNA  
446 contamination was assessed with a no reverse transcriptase control, and data was analyzed  
447 using the delta delta CT method. The following primers were used for qPCR:

448 dRP49-F: 5' CTC ATG CAG AAC CGC GTT TA 3'

449 dRP49-R: 5' ACA AAT GTG TAT TCC GAC CA 3'

450 SA-F: GGACAAGATAATACCACCCGC

451 SA-R: CGCTTGATCAGTTTCGCCAT

#### 452 **Generation of CRISPR deletion**

453 Small deletions (120-130bp) of the Cut binding site upstream of the *rpr* promoter were  
454 generated with CRISPR/Cas9 (Fig. S4). Two guide RNAs were cloned in pCFD4 Vector (Addgene,  
455 42749411) as previously described (Port et al., 2014). Stable gRNA transgenics were made by  
456 BestGene (CA, USA) and crossed with nos-cas9 (BL#54591). The progeny were screened for  
457 deletions by PCR, and breakpoints were confirmed by sequencing. Two lines CRISPR\_ILB\_2.9  
458 and 431CRISPR\_ILB\_3.1 were used for phenotypic analysis.

#### 459 **Fly stocks and genotypes**

460 All the Flies were raised at 25 °C . Wild-type fly lines used in this study are *yw*<sup>67c23</sup> and *wor-*  
461 *Gal4/+*. The following lines were obtained from the stocks centers at Bloomington, IN, USA (BL)  
462 and Vienna, Austria (VDRC) and by personal communications: *repo-Gal4* (BL), *UAS-nls-dsRed*  
463 (BL), *abdA-RNAi* (BL) and *cut-RNAi*(BL, VDRC), *SA RNAi* (BL), *NippedB RNAi* (BL) *UAS-Cut::UAS-*

464 mcd8-GFP (BL, Norbert Perrimon), nos-cas9 (BL), *cut*<sup>c145</sup> (BL), cut-RNAi ; cut-RNAi (provided by  
465 Y. N. Jan), UAS-abdA.HA (provided by Y Graba). The enh1- GFP transgenic line was previously  
466 generated in our lab (Arya et al 2015).

#### 467 **Immunostaining and Fluorescent in situ hybridization (FISH)**

468 Staining of whole embryos and larval CNS were done as described previously (Arya et al., 2015).

469 The following primary antibodies were used in various combinations: rat anti-Dpn (1:150 ,  
470 Abcam, Cambridge, MA, USA ), goat anti-AbdA (1 : 500, dH17, Santa Cruz, CA,USA), rabbit or  
471 mouse anti-GFP antibody (1 : 1000, rabbit, Invitrogen, Grand Island, NY, USA or mouse j18,  
472 Clontech, Mountain View, CA, USA), mouse anti-Cut (1:700, DSHB, Iowa City, IA, USA), rabbit  
473 anti-H3K27me3 (1:500, Active Motif, 39157), rabbit anti-H3K9me3 (1:500, Abcam, ab8898),  
474 rabbit anti-H3K27ac (1:500, Active Motif, 39136), rabbit anti-H3K4me3 (1:500, Active Motif,  
475 39159), and rabbit anti-Stromalin (1:700, a gift from Dale Dorsett). Secondary antibodies  
476 (Molecular Probes, Eugene, OR, USA) were used at 1:200 dilution.

477 FISH was performed as previously described (Arya et al., 2015). Digoxigenin (DIG)-labeled  
478 probes for *grim*, *rpr*, and GFP were used. When expression levels are compared, in situs were  
479 processed in parallel, and imaged with matched confocal settings and image processing.

480 Embryos were imaged with any Nikon A1SiR confocal (Melville, NY, USA). Image Processing was  
481 done using Nikon Elements, ImageJ or Adobe Photoshop.

482 The intensity of histone marks was quantified with ImageJ software: average fluorescence  
483 intensity within a hemisegment of the nervous system was calculated and normalized to the  
484 intensity of a corresponding area within the epidermis. This calculation was performed across

485 11 confocal slices beginning with the ventral-most slice of the nervous system, as determined  
486 by Deadpan staining. Data in Fig. S6 are presented as the ratio of the average intensity of signal  
487 within the nervous system to the average intensity of signal within the epidermis at a given  
488 confocal slice.

489 SA levels in NBs and neurons were quantified in ImageJ. SA intensity was measured in 10 NBs  
490 or neurons in A3 to A6 segments of 3 embryos. To account for embryo-to-embryo variability in  
491 staining, SA levels in NBs or neurons was normalized to the average SA intensity outside of  
492 nervous system in the same stack.

493

#### 494 **Acknowledgments**

495 We would like to thank Norbert Perrimon, Y-N Jan and the Bloomington stock center for fly  
496 stocks, Dale Dorsett and the Developmental Studies Hybridoma Bank for antibodies, Sarah  
497 Bowman, Katia Georgopoulos and Georgopoulos lab members for advice on ChIP studies and  
498 data analysis, the White lab and Katia Georgopoulos for comments on the manuscript. This  
499 work was funded by R01GM110477 (KW & LZ), R03NS092063 (KW) and an MGH Fund for  
500 Medical Discovery award (RA) and R01GM106174 (LZ).

#### 501 **References**

- 502 **Arya, R. and White, K.** (2015). Cell death in development: Signaling pathways and core  
503 mechanisms. *Semin Cell Dev Biol* **39**, 12-19.
- 504 **Arya, R., Sarkissian, T., Tan, Y. and White, K.** (2015). Neural stem cell progeny regulate stem  
505 cell death in a Notch and Hox dependent manner. *Cell Death Differ* **22**, 1378-1387.
- 506 **Bangs, P., Franc, N. and White, K.** (2000). Molecular mechanisms of cell death and  
507 phagocytosis in *Drosophila*. *Cell Death Differ.* **7**, 1027-1034.



- 508 **Bello, B., Holbro, N. and Reichert, H.** (2007). Polycomb group genes are required for neural  
509 stem cell survival in postembryonic neurogenesis of *Drosophila*. *Development* **134**, 1091-1099.
- 510 **Blochlinger, K., Bodmer, R., Jan, L. Y. and Jan, Y. N.** (1990). Patterns of expression of cut, a  
511 protein required for external sensory organ development in wild-type and cut mutant  
512 *Drosophila* embryos. *Genes Dev* **4**, 1322-1331.
- 513 **Bowman, S. K., Simon, M. D., Deaton, A. M., Tolstorukov, M., Borowsky, M. L. and Kingston,**  
514 **R. E.** (2013). Multiplexed Illumina sequencing libraries from picogram quantities of DNA. *BMC*  
515 *genomics* **14**, 466.
- 516 **Bowman, S. K., Deaton, A. M., Domingues, H., Wang, P. I., Sadreyev, R. I., Kingston, R. E. and**  
517 **Bender, W.** (2014). H3K27 modifications define segmental regulatory domains in the *Drosophila*  
518 bithorax complex. *eLife* **3**, e02833.
- 519 **Cenci, C. and Gould, A. P.** (2005). *Drosophila* Grainyhead specifies late programmes of neural  
520 proliferation by regulating the mitotic activity and Hox-dependent apoptosis of neuroblasts.  
521 *Development* **132**, 3835-3845.
- 522 **Cubelos, B., Sebastian-Serrano, A., Kim, S., Moreno-Ortiz, C., Redondo, J. M., Walsh, C. A. and**  
523 **Nieto, M.** (2008). Cux-2 controls the proliferation of neuronal intermediate precursors of the  
524 cortical subventricular zone. *Cereb Cortex* **18**, 1758-1770.
- 525 **Denton, D., Aung-Htut, M. T., Lorensuhewa, N., Nicolson, S., Zhu, W., Mills, K., Cakouros, D.,**  
526 **Bergmann, A. and Kumar, S.** (2013). UTX coordinates steroid hormone-mediated autophagy  
527 and cell death. *Nat Commun* **4**, 2916.
- 528 **Dorsett, D. and Kassis, J. A.** (2014). Checks and balances between cohesin and polycomb in  
529 gene silencing and transcription. *Curr Biol* **24**, R535-539.
- 530 **Feng, J., Liu, T., Qin, B., Zhang, Y. and Liu, X. S.** (2012). Identifying ChIP-seq enrichment using  
531 MACS. *Nat Protoc* **7**, 1728-1740.
- 532 **Iulianella, A., Sharma, M., Durnin, M., Vanden Heuvel, G. B. and Trainor, P. A.** (2008). Cux2  
533 (Cutl2) integrates neural progenitor development with cell-cycle progression during spinal cord  
534 neurogenesis. *Development* **135**, 729-741.
- 535 **Jiang, C. A., Lamblin, A. F. J., Steller, H. and Thummel, C. S.** (2000). A steroid-triggered  
536 transcriptional hierarchy controls salivary gland cell death during *Drosophila* metamorphosis.  
537 *Molecular Cell* **5**, 445-455.
- 538 **Johnson, T. K. and Judd, B. H.** (1979). Analysis of the Cut Locus of DROSOPHILA  
539 MELANOGASTER. *Genetics* **92**, 485-502.
- 540 **Kagey, M. H., Newman, J. J., Bilodeau, S., Zhan, Y., Orlando, D. A., van Berkum, N. L., Ebmeier,**  
541 **C. C., Goossens, J., Rahl, P. B., Levine, S. S. et al.** (2010). Mediator and cohesin connect gene  
542 expression and chromatin architecture. *Nature* **467**, 430-435.
- 543 **Kang, Y., Marischuk, K., Castelvechi, G. D. and Bashirullah, A.** (2017). HDAC Inhibitors Disrupt  
544 Programmed Resistance to Apoptosis During *Drosophila* Development. *G3 (Bethesda)* **7**, 1985-  
545 1993.

- 546 **Karch, F., Bender, W. and Weiffenbach, B.** (1990). *abdA* expression in *Drosophila* embryos.  
547 *Genes Dev* **4**, 1573-1587.
- 548 **Khandelwal, R., Sipani, R., Govinda Rajan, S., Kumar, R. and Joshi, R.** (2017). Combinatorial  
549 action of Grainyhead, Extradenticle and Notch in regulating Hox mediated apoptosis in  
550 *Drosophila* larval CNS. *PLoS Genet* **13**, e1007043.
- 551 **Kornbluth, S. and White, K.** (2005). Apoptosis in *Drosophila*: neither fish nor fowl (nor man, nor  
552 worm). *J Cell Sci* **118**, 1779-1787.
- 553 **Langmead, B. and Salzberg, S. L.** (2012). Fast gapped-read alignment with Bowtie 2. *Nat*  
554 *Methods* **9**, 357-359.
- 555 **Lin, N., Li, X., Cui, K., Chepelev, I., Tie, F., Liu, B., Li, G., Harte, P., Zhao, K., Huang, S. et al.**  
556 (2011). A Barrier-Only Boundary Element Delimits the Formation of Facultative  
557 Heterochromatin in *Drosophila melanogaster* and Vertebrates. *Mol Cell Biol* **31**, 2729-2741.
- 558 **Lohmann, I., McGinnis, N., Bodmer, M. and McGinnis, W.** (2002). The *Drosophila* Hox gene  
559 deformed sculpts head morphology via direct regulation of the apoptosis activator reaper. *Cell*  
560 **110**, 457-466.
- 561 **Marshall, O. J. and Brand, A. H.** (2017). Chromatin state changes during neural development  
562 revealed by in vivo cell-type specific profiling. *Nat Commun* **8**, 2271.
- 563 **Maurange, C., Cheng, L. and Gould, A. P.** (2008). Temporal transcription factors and their  
564 targets schedule the end of neural proliferation in *Drosophila*. *Cell* **133**, 891-902.
- 565 **Micchelli, C. A., Rulifson, E. J. and Blair, S. S.** (1997). The function and regulation of cut  
566 expression on the wing margin of *Drosophila*: Notch, Wingless and a dominant negative role for  
567 Delta and Serrate. *Development* **124**, 1485-1495.
- 568 **Misulovin, Z., Schwartz, Y. B., Li, X. Y., Kahn, T. G., Gause, M., MacArthur, S., Fay, J. C., Eisen,  
569 M. B., Pirrotta, V., Biggin, M. D. et al.** (2008). Association of cohesin and Nipped-B with  
570 transcriptionally active regions of the *Drosophila melanogaster* genome. *Chromosoma* **117**, 89-  
571 102.
- 572 **Moon, N. S., Di Stefano, L., Morris, E. J., Patel, R., White, K. and Dyson, N. J.** (2008). E2F and  
573 p53 induce apoptosis independently during *Drosophila* development but intersect in the  
574 context of DNA damage. *PLoS Genet* **4**, e1000153.
- 575 **Negre, N., Brown, C. D., Ma, L., Bristow, C. A., Miller, S. W., Wagner, U., Kheradpour, P.,  
576 Eaton, M. L., Loriaux, P., Sealfon, R. et al.** (2011). A cis-regulatory map of the *Drosophila*  
577 genome. *Nature* **471**, 527-531.
- 578 **Nepveu, A.** (2001). Role of the multifunctional CDP/Cut/Cux homeodomain transcription factor  
579 in regulating differentiation, cell growth and development. *Gene* **270**, 1-15.
- 580 **Newkirk, D. A., Chen, Y. Y., Chien, R., Zeng, W., Biesinger, J., Flowers, E., Kawauchi, S., Santos,  
581 R., Calof, A. L., Lander, A. D. et al.** (2017). The effect of Nipped-B-like (Nipbl) haploinsufficiency  
582 on genome-wide cohesin binding and target gene expression: modeling Cornelia de Lange  
583 syndrome. *Clin Epigenetics* **9**, 89.

- 584 **Peterson, C., Carney, G. E., Taylor, B. J. and White, K.** (2002). reaper is required for neuroblast  
585 apoptosis during *Drosophila* development. *Development* **129**, 1467-1476.
- 586 **Pitsouli, C. and Perrimon, N.** (2010). Embryonic multipotent progenitors remodel the  
587 *Drosophila* airways during metamorphosis. *Development* **137**, 3615-3624.
- 588 **Pitsouli, C. and Perrimon, N.** (2013). The homeobox transcription factor cut coordinates  
589 patterning and growth during *Drosophila* airway remodeling. *Sci Signal* **6**, ra12.
- 590 **Port, F., Chen, H. M., Lee, T. and Bullock, S. L.** (2014). Optimized CRISPR/Cas tools for efficient  
591 germline and somatic genome engineering in *Drosophila*. *Proc Natl Acad Sci U S A* **111**, E2967-  
592 2976.
- 593 **Prokop, A., Bray, S., Harrison, E. and Technau, G. M.** (1998). Homeotic regulation of segment-  
594 specific differences in neuroblast numbers and proliferation in the *Drosophila* central nervous  
595 system. *Mech Dev* **74**, 99-110.
- 596 **Rollins, R. A., Morcillo, P. and Dorsett, D.** (1999). Nipped-B, a *Drosophila* homologue of  
597 chromosomal adherins, participates in activation by remote enhancers in the cut and  
598 Ultrabithorax genes. *Genetics* **152**, 577-593.
- 599 **Sansregret, L. and Nepveu, A.** (2008). The multiple roles of CUX1: insights from mouse models  
600 and cell-based assays. *Gene* **412**, 84-94.
- 601 **Schaaf, C. A., Kwak, H., Koenig, A., Misulovin, Z., Gohara, D. W., Watson, A., Zhou, Y., Lis, J. T.**  
602 **and Dorsett, D.** (2013). Genome-wide control of RNA polymerase II activity by cohesin. *PLoS*  
603 *Genet* **9**, e1003382.
- 604 **Song, S. H., Han, S. W. and Bang, Y. J.** (2011). Epigenetic-based therapies in cancer: progress to  
605 date. *Drugs* **71**, 2391-2403.
- 606 **Tan, Y., Yamada-Mabuchi, M., Arya, R., St Pierre, S., Tang, W., Tosa, M., Brachmann, C. and**  
607 **White, K.** (2011). Coordinated expression of cell death genes regulates neuroblast apoptosis.  
608 *Development* **138**, 2197-2206.
- 609 **Truman, J. W. and Bate, M.** (1988). Spatial and temporal patterns of neurogenesis in the  
610 central nervous system of *Drosophila melanogaster*. *Dev Biol* **125**, 145-157.
- 611 **Uyehara, C. M., Nystrom, S. L., Niederhuber, M. J., Leatham-Jensen, M., Ma, Y., Buttitta, L. A.**  
612 **and McKay, D. J.** (2017). Hormone-dependent control of developmental timing through  
613 regulation of chromatin accessibility. *Genes Dev* **31**, 862-875.
- 614 **White, K., Grether, M. E., Abrams, J. M., Young, L., Farrell, K. and Steller, H.** (1994). Genetic  
615 control of programmed cell death in *Drosophila*. *Science* **264**, 677-683.
- 616 **Wong, C. C., Martincorena, I., Rust, A. G., Rashid, M., Alifrangis, C., Alexandrov, L. B., Tiffen, J.**  
617 **C., Kober, C., Chronic Myeloid Disorders Working Group of the International Cancer Genome,**  
618 **C., Green, A. R. et al.** (2014). Inactivating CUX1 mutations promote tumorigenesis. *Nat Genet*  
619 **46**, 33-38.
- 620 **Wright, K. M., Smith, M. I., Farrag, L. and Deshmukh, M.** (2007). Chromatin modification of  
621 Apaf-1 restricts the apoptotic pathway in mature neurons. *J Cell Biol* **179**, 825-832.

- 622 **Wu, Y., Gause, M., Xu, D., Misulovin, Z., Schaaf, C. A., Mosarla, R. C., Mannino, E., Shannon,**  
623 **M., Jones, E., Shi, M. et al.** (2015). *Drosophila* Nipped-B Mutants Model Cornelia de Lange  
624 Syndrome in Growth and Behavior. *PLoS Genet* **11**, e1005655.
- 625 **Xu, S., Grullon, S., Ge, K. and Peng, W.** (2014). Spatial clustering for identification of ChIP-  
626 enriched regions (SICER) to map regions of histone methylation patterns in embryonic stem  
627 cells. *Methods Mol Biol* **1150**, 97-111.
- 628 **Yuzyuk, T., Fakhouri, T. H., Kiefer, J. and Mango, S. E.** (2009). The polycomb complex protein  
629 mes-2/E(z) promotes the transition from developmental plasticity to differentiation in *C.*  
630 *elegans* embryos. *Dev Cell* **16**, 699-710.
- 631 **Zhai, Z., Ha, N., Papagiannouli, F., Hamacher-Brady, A., Brady, N., Sorge, S., Bezdán, D. and**  
632 **Lohmann, I.** (2012). Antagonistic regulation of apoptosis and differentiation by the Cut  
633 transcription factor represents a tumor-suppressing mechanism in *Drosophila*. *PLoS Genet* **8**,  
634 e1002582.
- 635 **Zhang, C., Casas-Tinto, S., Li, G., Lin, N., Chung, M., Moreno, E., Moberg, K. H. and Zhou, L.**  
636 (2015). An intergenic regulatory region mediates *Drosophila* Myc-induced apoptosis and blocks  
637 tissue hyperplasia. *Oncogene* **34**, 2385-2397.
- 638 **Zhang, Y., Lin, N., Carroll, P. M., Chan, G., Guan, B., Xiao, H., Yao, B., Wu, S. S. and Zhou, L.**  
639 (2008). Epigenetic blocking of an enhancer region controls irradiation-induced proapoptotic  
640 gene expression in *Drosophila* embryos. *Dev Cell* **14**, 481-493.
- 641 **Zhu, J., Adli, M., Zou, J. Y., Verstappen, G., Coyne, M., Zhang, X., Durham, T., Miri, M.,**  
642 **Deshpande, V., De Jager, P. L. et al.** (2013). Genome-wide chromatin state transitions  
643 associated with developmental and environmental cues. *Cell* **152**, 642-654.
- 644

**Figure 1** *cut* is necessary and sufficient for NB death. A-C) Knockdown of *cut* in the nervous system, or *cut* loss in mutants embryos, results in ectopic NB survival, as detected by Dpn staining in stage 17 embryos. D-F) *cut* overexpression results in NB loss by apoptosis. Fewer NBs can be seen in each hemisegment, particularly in the anterior of each hemisegment. This NB loss is blocked by the broad-spectrum caspase inhibitor p35. G) Premature NB loss resulting from *cut* overexpression is significant at stage 14.\* P<0.05 by unpaired T test

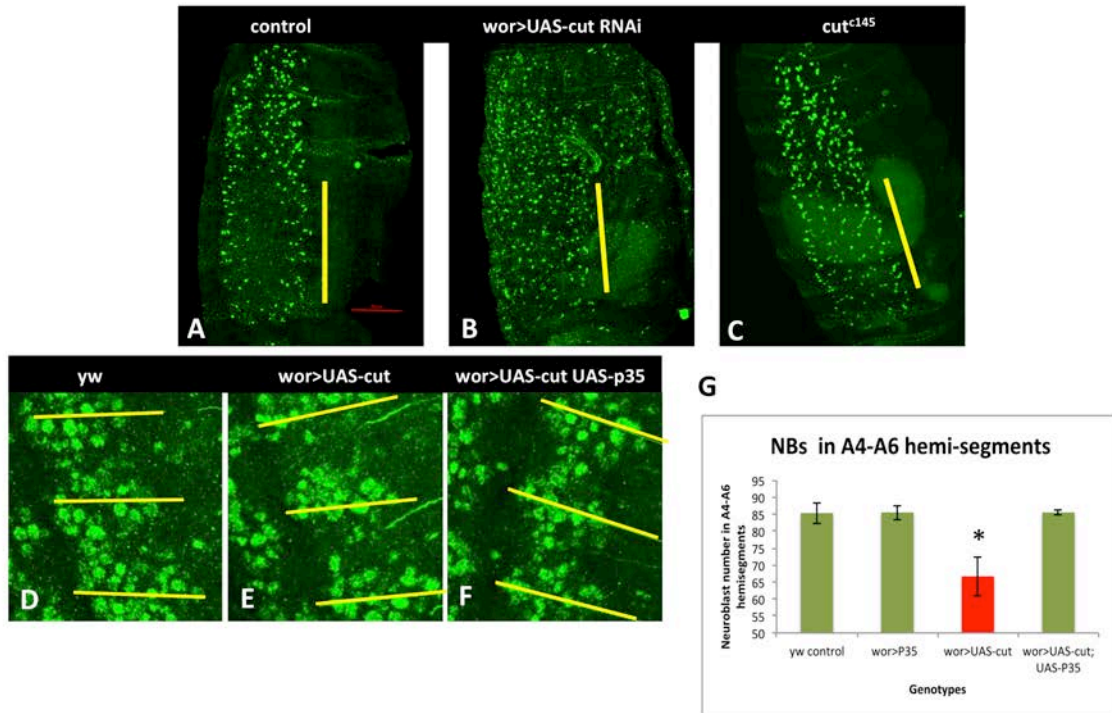

**Figure 2. *cut* alters *rpr* and *grim* levels independently of the neuroblast regulatory region** A-D) *cut* knockdown in the CNS decreases *rpr* and *grim* expression, as detected by in situ. E-H) On *cut* overexpression, *rpr* and *grim* mRNA levels are increased. P35 is used to block ectopic cell death induced by *cut*. I-J) *cut* knockdown does not alter expression of enhancer1-GFP, indicating that *cut* is likely to influence *rpr* and *grim* expression and cell death independently of the NB regulatory region (K).

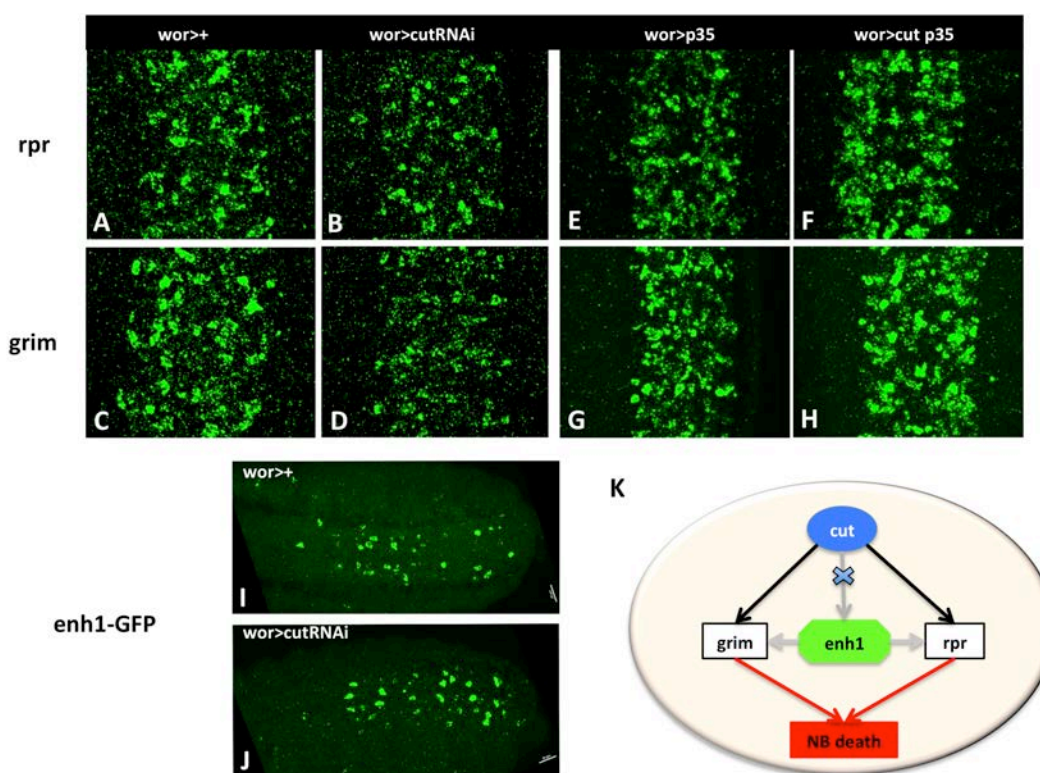

**Figure 3. *cut* acts downstream of *abdA*** A-C) Knockdown of *cut* inhibits NB killing by *abdA* overexpression in both abdominal and thoracic domains. NBs are detected by anti-Dpn. D-F) Loss of *cut* does not inhibit ectopic *enh1* expression in thoracic segments (bracket) induced by *abdA* mis-expression. GFP is detected by in situ, G-H) Knockdown of *abdA* does not rescue NB death induced by *cut* overexpression. *abdA* knockdown alone results in ectopic NB survival (J).

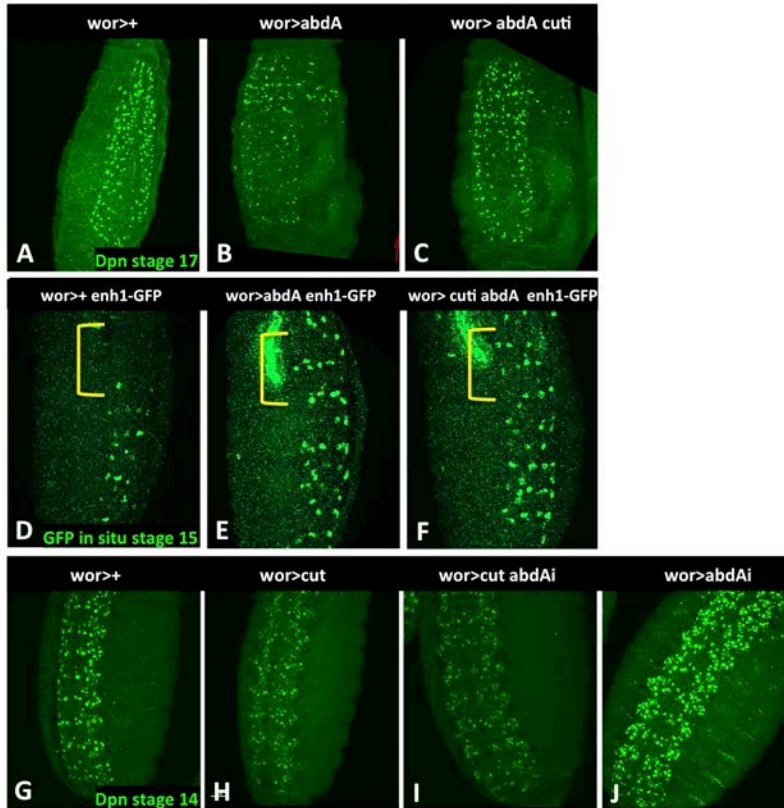

**Figure 4. *cut* knockdown increases H3K27me3 levels in the *rpr* to *grim* interval.** A) ChIP-Seq on sorted CNS nuclei from *wor>+* and *wor>cutRNAi* show an increase in H3K27me3 modifications in the *rpr* region after *cut* knockdown, as detected by SICER peak calling. B) Verification by ChIP-qPCR shows increased enrichment of H3K27me3 at the promoters of *grim* and *rpr*, and 5' of *rpr* in chromatin from sorted nuclei isolated from *wor>cutRNAi* when compared to *wor>+*. All data are normalized to levels in the intergenic region. Primer regions are boxed in A. C) H3K27me3 levels are lower in NBs than in the rest of the embryo. D,E) The proportion of NBs with strong H3K27me3 labeling show increases at embryos age (white arrows, H3K27me3-negative NBs; yellow arrowheads, H3K27me3-high NBs). Knockdown of *cut* increases the number of H3K27me3 high NBs at stages 14 through 16. \*  $p < 0.05$  by unpaired T test.

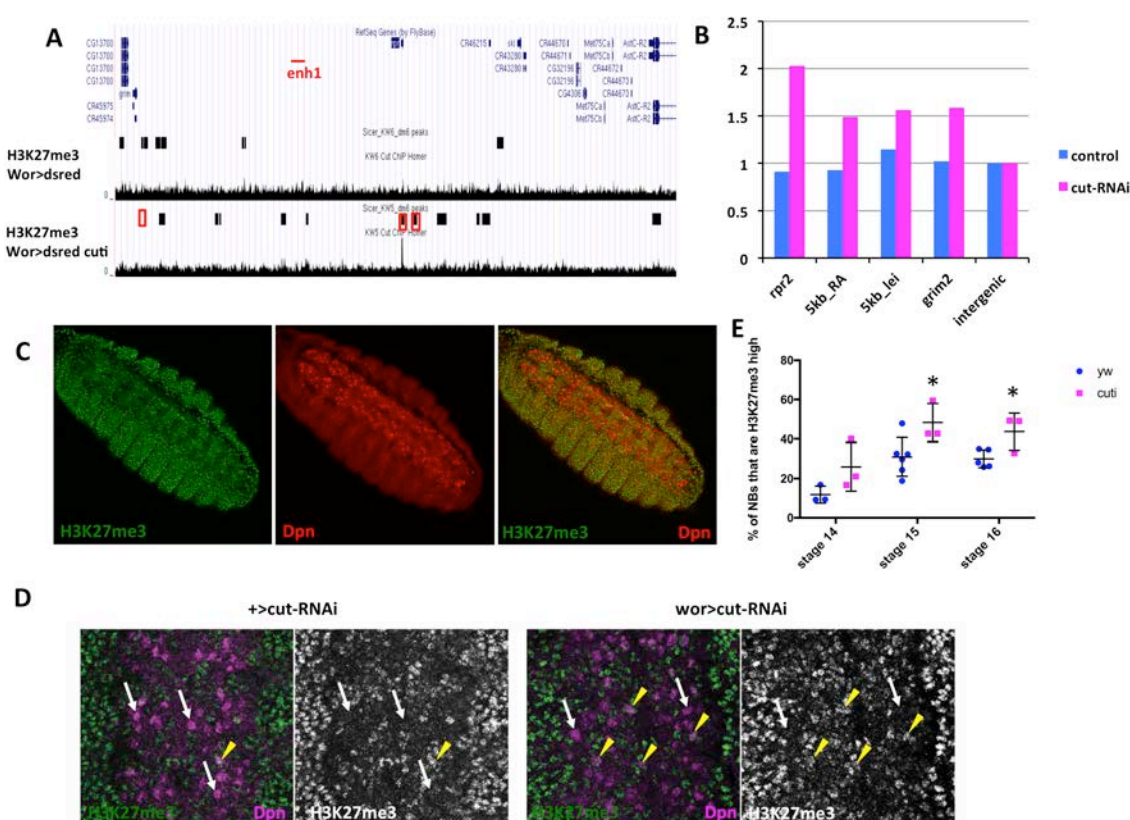



**Figure 5** *cut* knockdown alters the expression of the cohesin component SA. A) A peak of H3K27Ac over SA disappears on *cut* knockdown. B) qPCR on RNA from sorted CNS nuclei shows a decrease in SA levels. C) SA levels are decreased in the CNS by *cut* knockdown. D) mean intensity of SA in NBs relative to non-CNS cells is significantly decreased on *cut* knockdown. E) mean intensity of SA in neurons relative to non-CNS cells is significantly decreased on *cut* knockdown. \*  $p < 0.05$  by unpaired T test.

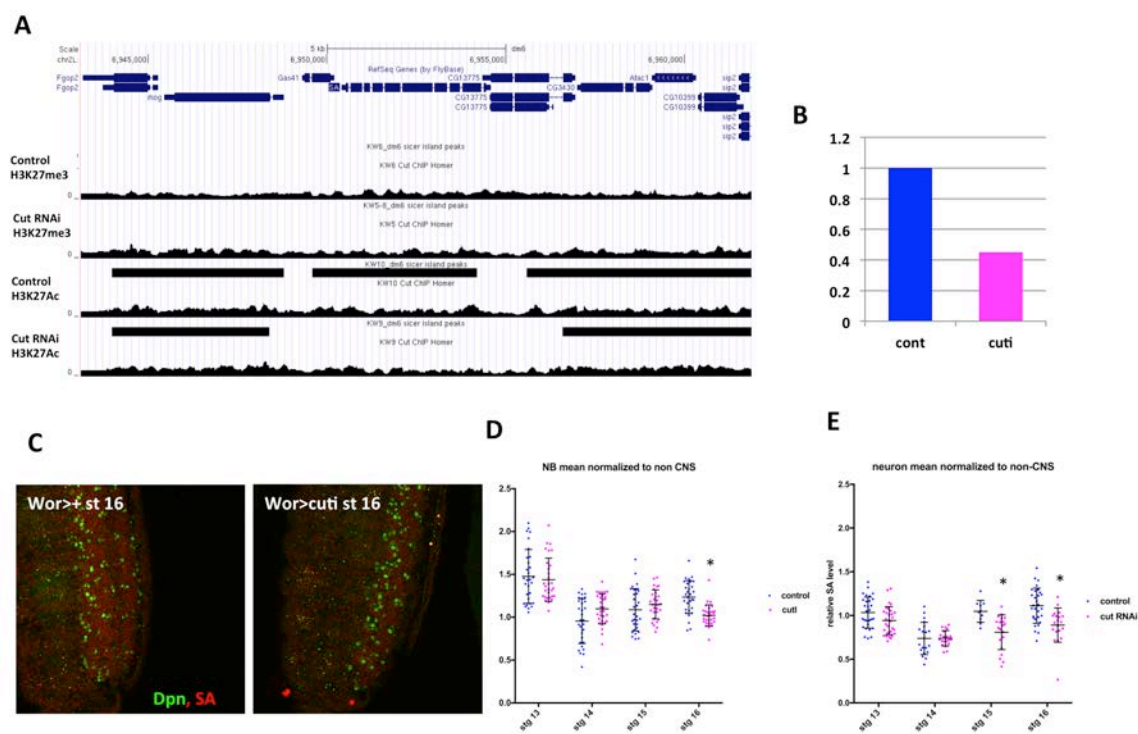

**Figure 6 Cohesin is required for normal abdominal NB death.** A-C) Dpn staining reveals ectopic NB survival in stage 17 embryos after SA or Nipped-B knockdown. D) Dpn positive NBs were counted in 3 segments, and show significant increases in stage 17 embryos on cohesin knockdown. E) Knockdown of SA results in an increased proportion of H3K27me3 positive NBs at stage 16. \* $p < 0.05$  by unpaired T test.

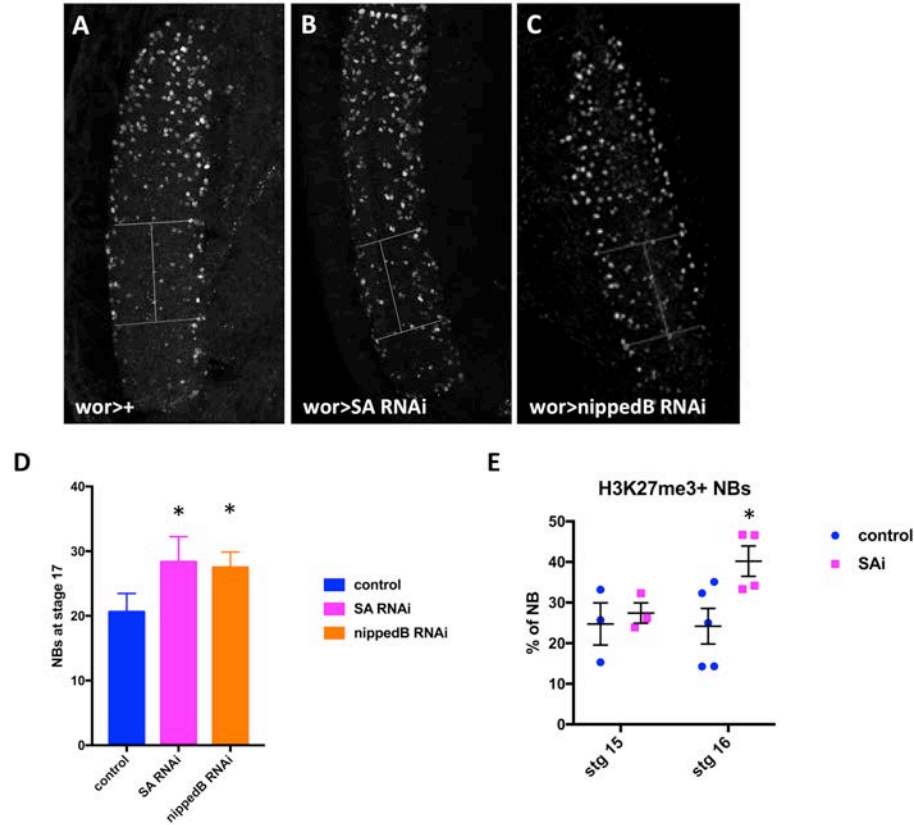

**Figure 7 Model of *cut* action in NB death.** As neural stem cells age they show an overall increase in repressive chromatin, marked by H3K27me3. Expression of *cut* inhibits this increase, at least in part through enhancement of cohesin expression. At the *rpr* promoter, this allows enhancers, activated by additional cell type specific spatial and temporal factors, to turn on the transcription of *rpr*, *grim* and *skl*. When *cut* expression is suppressed, *SA* and possibly other cohesin subunits decline, allowing a premature increase in H3K27me3 in NBs. At the *rpr* locus, this blocks expression in response to upstream apoptosis regulatory factors. Other upstream regulators may influence cohesin levels in other tissues.

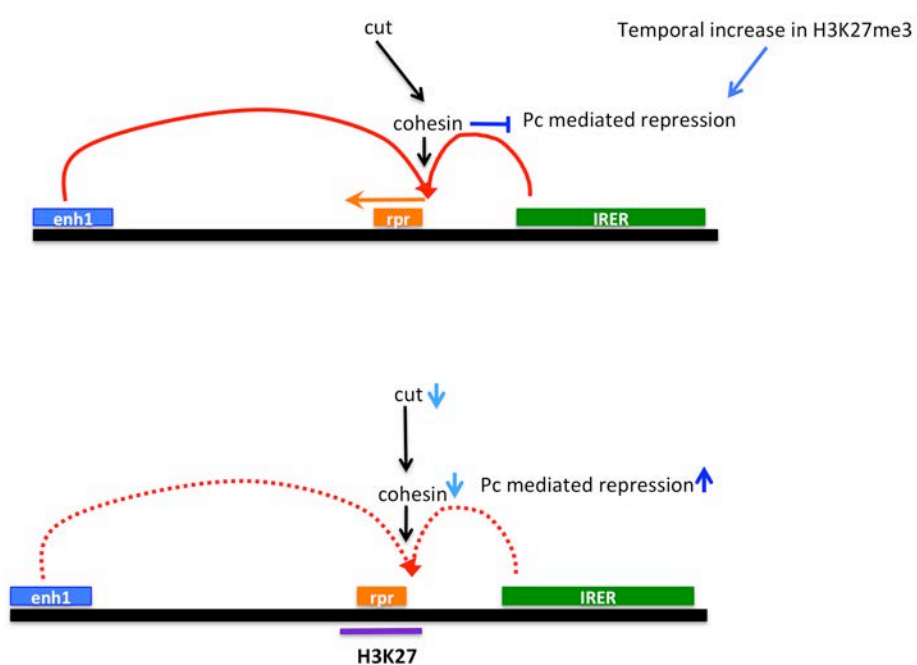

**Supplementary Figure 1 Knockdown of *cut* in the CNS with *wor>cutRNAi* results in ectopic NB survival in larvae.** In mid-third instar larvae, ectopic NBs are clearly visible in the abdominal ganglia. In late third instar larvae, many of these ectopic NBs have died, but at least one ectopic NB lineage remains. Knockdown of *cut* in glia with *repo>cutRNAi* does not result in ectopic NB survival.

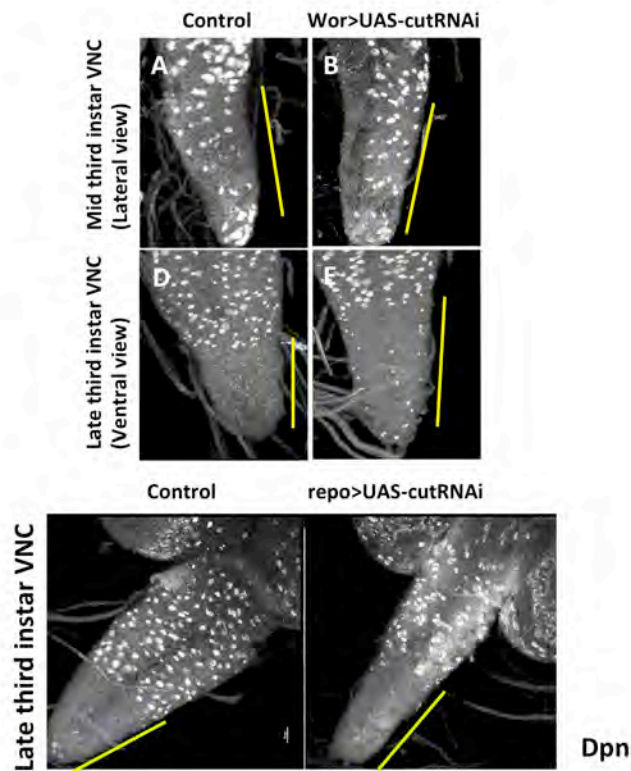

**Supplementary Figure 2 Cut expression in the CNS corresponds to the period of NB death.** Cut levels increase in the CNS starting at stage 13/14, and are highest by late stage 16. All embryos were imaged at the same settings for Cut staining intensity. Dpn staining marks the NBs.

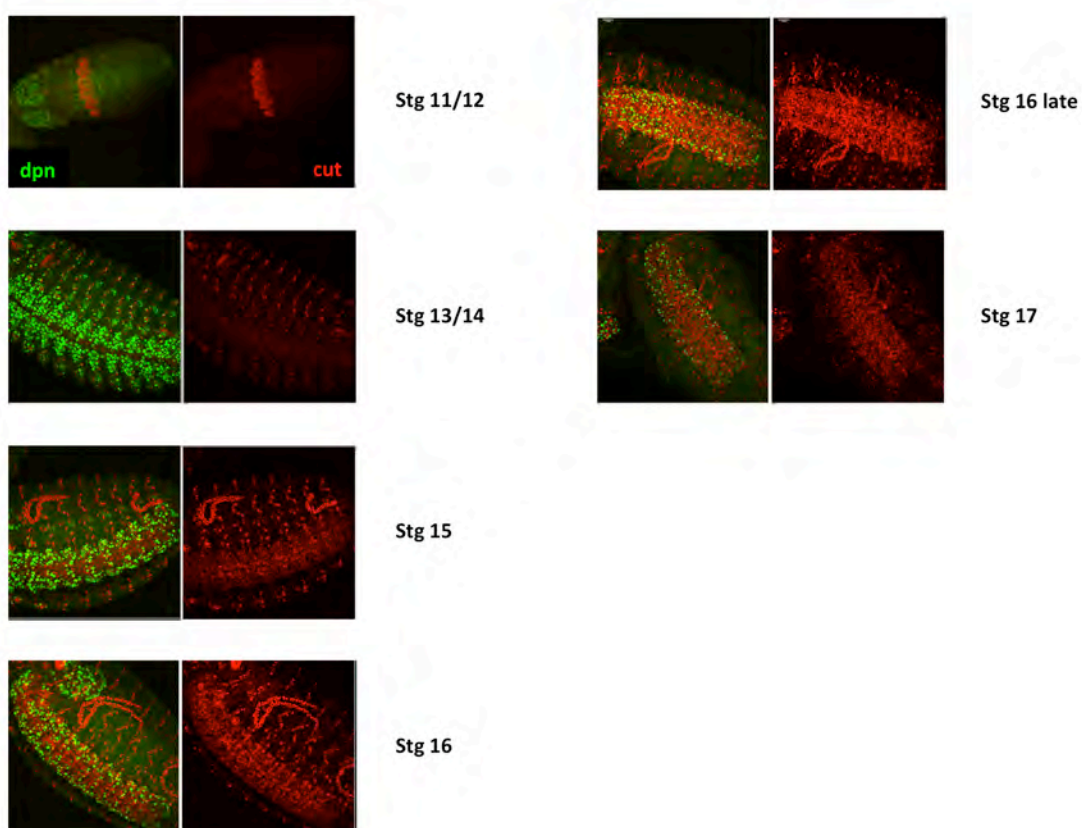

**Supplementary Figure 3. Expression of *cut* under control of the heat shock promoter results in a large increase in cell death, both within the nervous system and in other tissues.** TUNEL staining marks apoptotic cells. An overnight collection of embryos from the cross *hs-gal4 X UAS-cut mcd8GFP/Bal* was heat shocked for 1.5 hours at 37°C, allowed to recover for 4 hours and then stained for TUNEL and GFP, GFP staining is not shown.

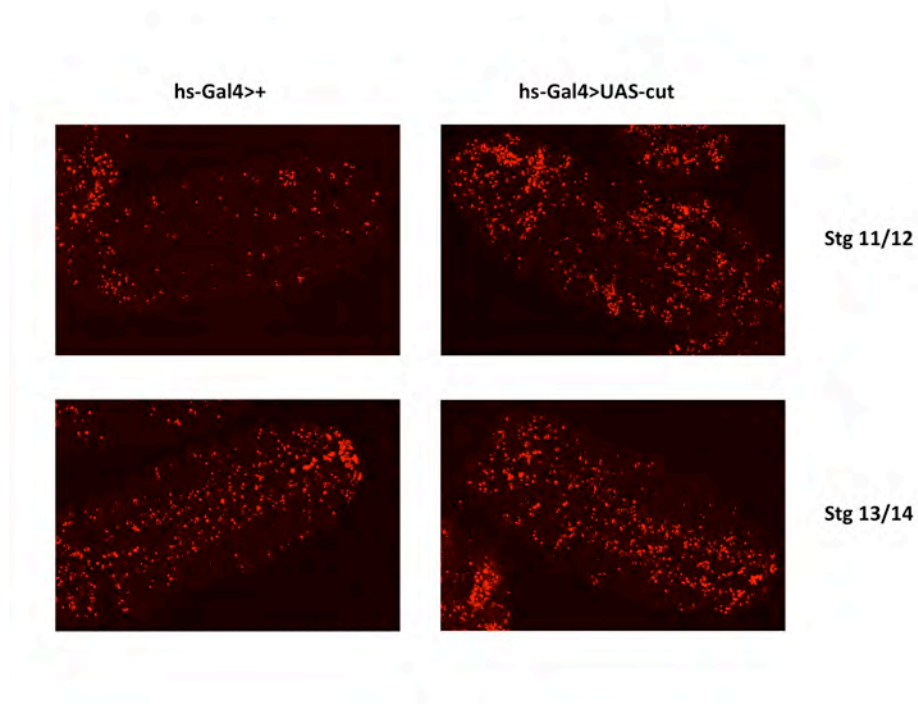

**Supplementary Figure 4. Crispr strategy for deletion of the putative Cut binding site at the ILB** **A)** The reported Cut binding site lies within the IRER left boundary, 5' to the *rpr* transcribed region (Lin et al., 2011). Guide RNAs for CRISPR/Cas9 were selected to flank the binding site. Transgenic gRNA flies were crossed to nos-Cas9, and screened for deletions by PCR. Breakpoints were confirmed by sequencing. **B)** Late embryos homozygous for two deletions of the Cut binding site do not result in ectopic NB survival.

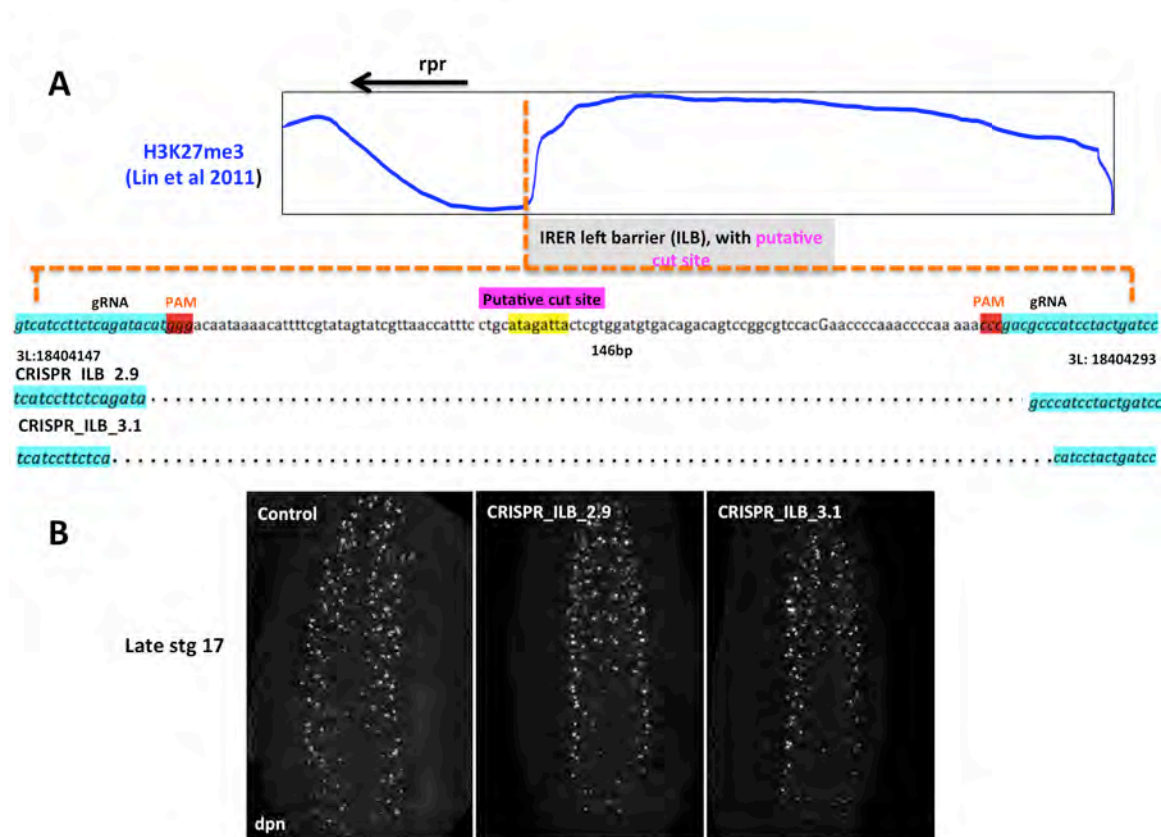

**Supplementary Figure 5. H3K27me3 enrichment at the *rpr* promoter as demonstrated by qPCR.** ChIP with an independent chromatin preparation from sorted nuclei demonstrates increased enrichment of H3K27me3 at the *rpr* promoter following *cut* knockdown with *wor>cut*RNAi.

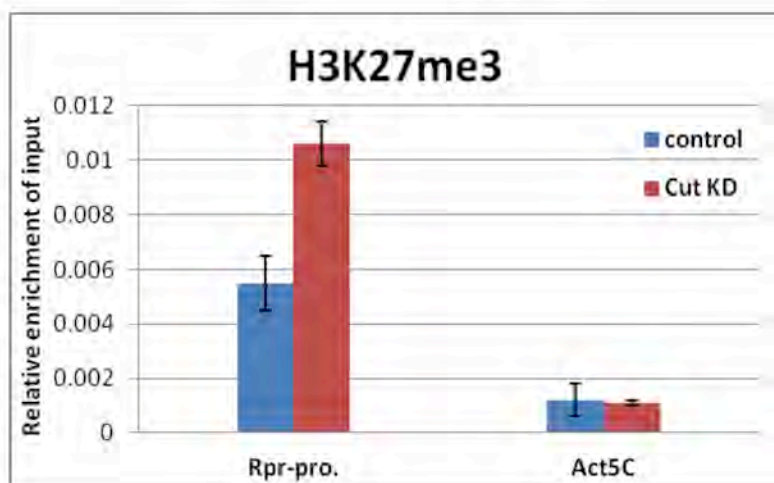



**Supplementary Figure 6. H3K27me3, but not other histone modifications, is differentially expressed between neuroblast and neuron layers of the ventral nerve cord (VNC) of stage 13 embryos.** H3K27me3 (**A-A'''**) is absent from Dpn-positive neuroblasts (**A** and **A'**) but is present in dorsal layers of the nerve cord that contain neurons (**A''** and **A'''**). H3K27ac (**B-B'''**), H3K9me3 (**C-C'''**) and H3K4me3 (**D-D'''**) are present in both neuroblast and neuronal layers of the VNC. Relative H3K27me3 levels increase along the ventral-dorsal axis in the VNC: H3K27me3 staining is shown within one hemisegment of the VNC at the level of neuroblasts (**E, top left**) or neurons (**E, top right**), and quantified as relative intensity within each single confocal slice, normalized to the epidermis (**E, bottom**). In contrast, there is no change in relative H3K27ac levels along the ventral-dorsal axis, as shown in one hemisegment at the level of neuroblasts (**F, top left**) or neurons (**F, top right**), and quantified as in E (**F, bottom**). There is also no change in relative levels of H3K4me3 in the CNS, as shown in **H. G**) H3K9me3 is generally lower in the VNC overall, and shows slight reduction in relative levels in NBs at this stage.

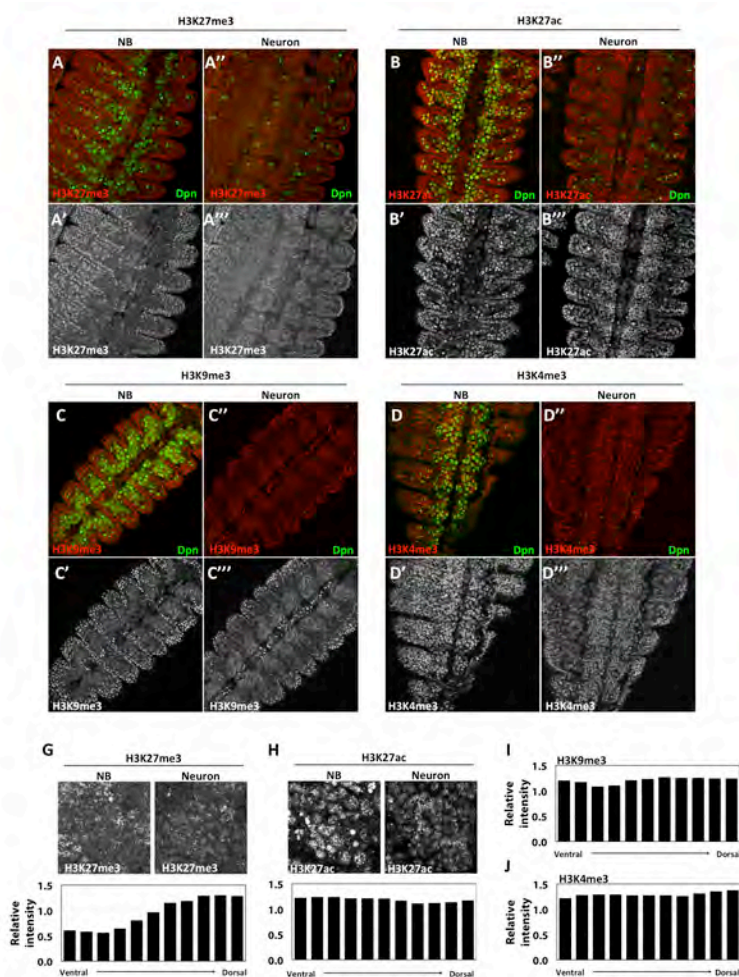

**Supplementary Figure 7 SA and Nipped-B do not regulate Cut expression in the CNS.**

Embryos expressing RNAi against SA or Nipped-B under control of wor-gal4 were collected overnight, fixed and stained for Dpn and Cut. Stage 14 embryos from each genotype were imaged at the same settings. Maximum projections are shown.

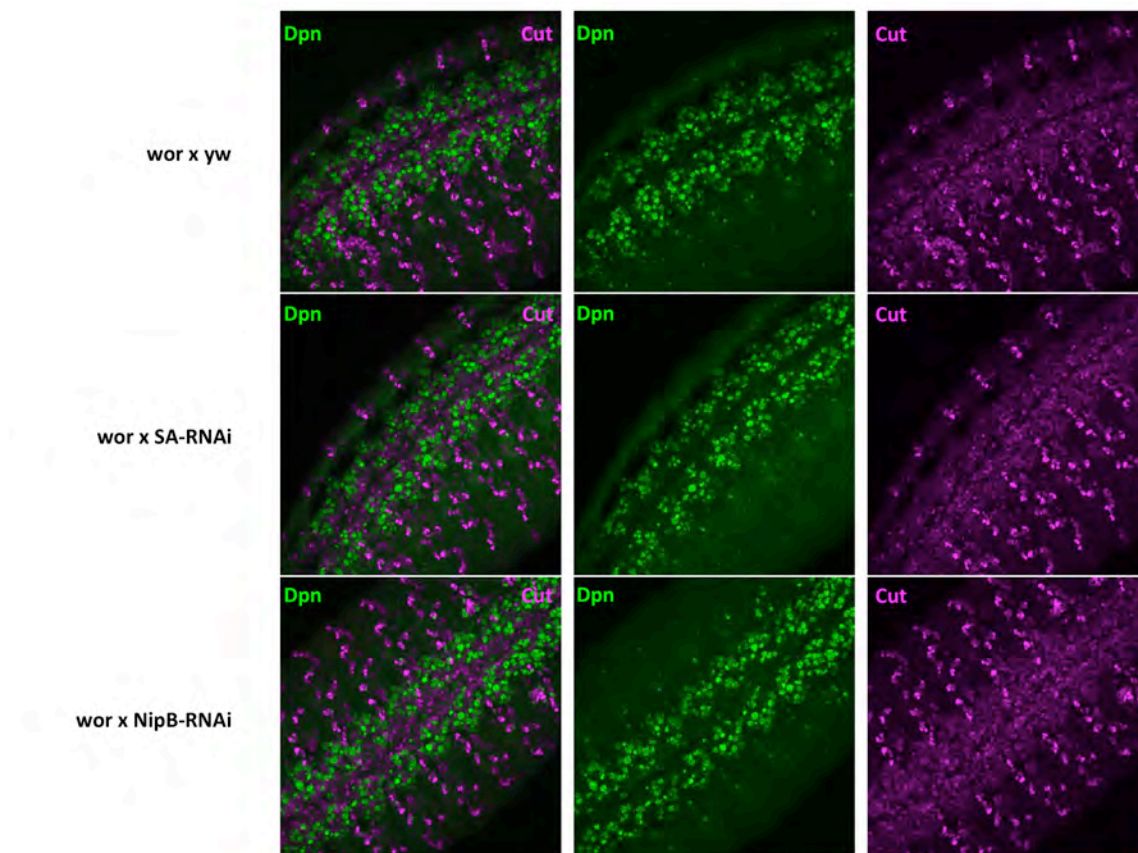

Source: https://www.biorxiv.org/content/10.1101/299164v1.full.pdf
